# Supplementary material for: A dual Z-scheme heterojunction Cu-CuTCPP/Cu2O/CoAl-LDH for photocatalytic CO2 reduction to C1 and C2 products
Source: Royal Society of Chemistry journal article supplement (doi:10.1039/d3dt01969a), 2023-01-01
Supplement: d3dt01969a1.pdf [file d3dt01969a1.pdf]

Supplementary information

A dual Z-scheme heterojunction Cu-CuTCPP/Cu<sub>2</sub>O/CoAl-LDH for photocatalytic

CO<sub>2</sub> reduction to C1 and C2 products

*Cheng Xia*<sup>a</sup>, *Rui-tang Guo*<sup>a, b, \*</sup>, *Zhe-xu Bi*<sup>a</sup>, *Zhen-rui Zhang*<sup>a</sup>, *Chu-fan Li*<sup>a</sup>, *Wei-guo Pan*<sup>a</sup>,  
<sup>b</sup>

<sup>a</sup> College of Energy and Mechanical Engineering, Shanghai University of Electric

Power, Shanghai, China

<sup>b</sup> Shanghai Non-Carbon Energy Conversion and Utilization Institute, Shanghai, China

**Corresponding author:** Rui-tang Guo

**Email:** grta@sohu.com

Gas chromatography

The gas path is consisted of high purity Ar (99.999%), high purity H<sub>2</sub> (99.999%), and high purity air (99.999%). During the experiment, a mass flowmeter was used to control the gas flow, and steel pipe was applied to connect the gas path. GC-2014C gas chromatography of Shimadzu company was used to analyze the composition of the gas produced in the process of photocatalytic reduction of CO<sub>2</sub>. Figure S1 displays the system flowchart. In the whole analysis process, high-purity Ar was used as the carrier gas, CO and CH<sub>4</sub> were detected in FID1, C<sub>2</sub> products such as C<sub>2</sub>H<sub>2</sub>, C<sub>2</sub>H<sub>4</sub> and C<sub>2</sub>H<sub>6</sub> were measured in FID2, and H<sub>2</sub> and O<sub>2</sub> in gas phase products were analyzed by TCD detector.

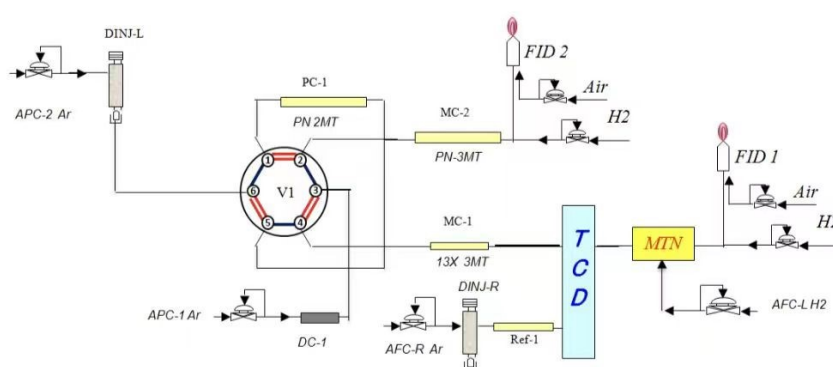

Fig. S1 The flow diagram of the online analysis system in photocatalytic reduction of CO<sub>2</sub>.

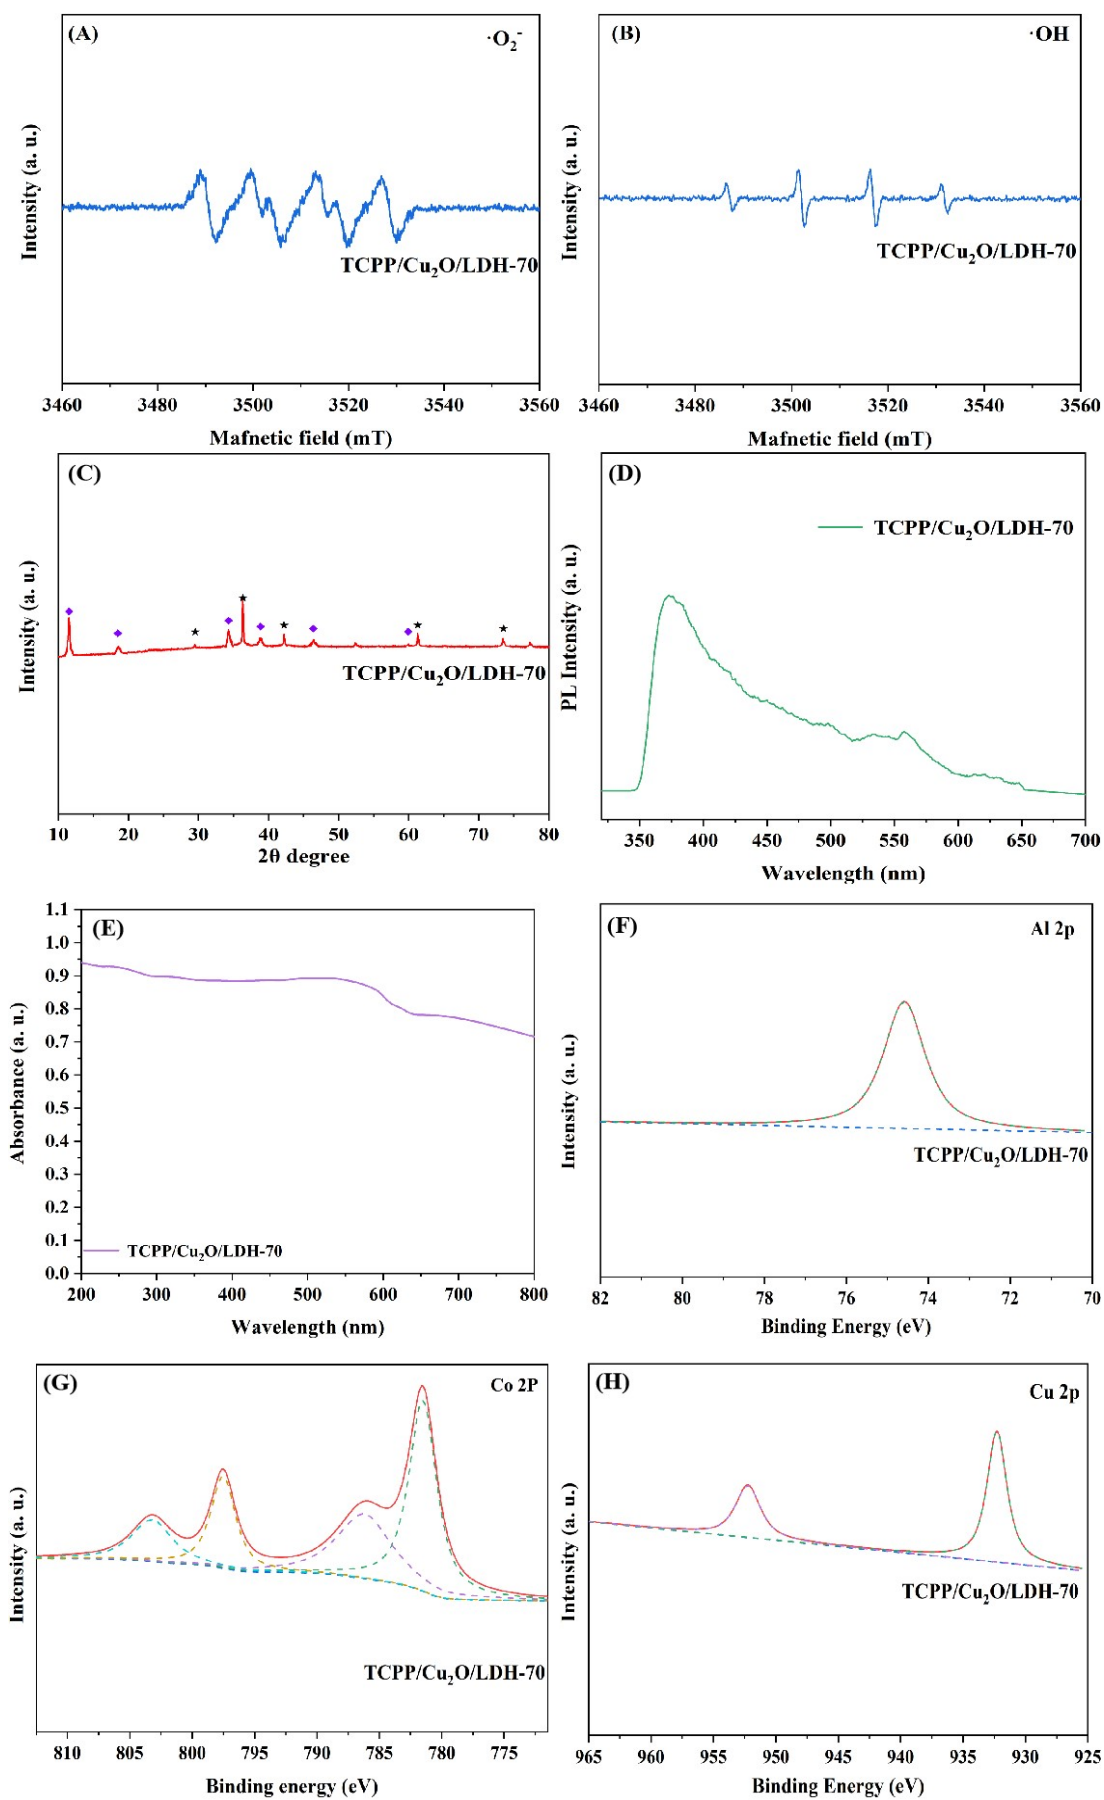

Fig. S2 EPR (A and B), XRD (C), PL (D), UV-vis DRS (E), and XPS (F, G, and H) plots of

TCPP/Cu<sub>2</sub>O/CoAl-LDH-70 after cyclic testing.
